# Supplementary material
Source: PubMed Central journal article supplement (PMC11029278)
Supplement: 262_2016_1944_MOESM1_ESM.pdf [file 262_2016_1944_MOESM1_ESM.pdf]

**Supplementary Table 1: Panels of antibodies used for flow cytometry**

| <b>Panel</b>                               | <b>Specificity</b> | <b>Fluorochrome</b> | <b>Ab clone</b> | <b>Vendor</b>     |
|--------------------------------------------|--------------------|---------------------|-----------------|-------------------|
| <b>Monocytic cells and MDSCs (panel 1)</b> | CD3                | PerCP               | SK7             | BD                |
|                                            | CD4                | PerCP               | SK3             | BD                |
|                                            | CD8                | PerCP               | SK1             | BD                |
|                                            | CD11b              | APC-Cy7             | ICRF44          | BD                |
|                                            | CD14               | PE-Cy7              | M5E2            | BioLegend         |
|                                            | CD15               | FITC                | HI98            | BD                |
|                                            | CD16               | PB                  | 3G8             | BioLegend         |
|                                            | CD56               | A700                | B159            | BD                |
|                                            | CD33               | PE                  | HIM3-4          | eBioscience       |
|                                            | CD124              | APC                 | 25463           | R&D systems       |
|                                            | HLA-DR             | PerCP-Cy5.5         | G46-6           | BD                |
| <b>T cells and Tregs (panel 2)</b>         | CD3                | PO                  | UCHT1           | Life Technologies |
|                                            | CD4                | PerCP               | SK3             | BD                |
|                                            | CD8                | APC-H7              | SK1             | BD                |
|                                            | CD25               | PE                  | M-A251          | BD                |
|                                            | CD45RA             | BV421               | HI100           | BioLegend         |
|                                            | CD103              | FITC                | Ber-ACT8        | BD                |
|                                            | FoxP3              | Alexa647            | 259DC7          | BD                |

MDSCs: myeloid-derived suppressor cells; Tregs: regulatory T cells

**Supplementary Table 2: Associations between baseline factors and OS**

| Factor                                                                                                                                                 | Categories           | N (%)     | % dead | Overall survival according to Kaplan-Meier |                         |         |
|--------------------------------------------------------------------------------------------------------------------------------------------------------|----------------------|-----------|--------|--------------------------------------------|-------------------------|---------|
|                                                                                                                                                        |                      |           |        | Median survival (months)                   | 1-year OS rate (95% CI) | p-value |
| Total cohort                                                                                                                                           |                      | 15 (100)  | 80.0   | 7.6                                        | 33.3 (9.5;57.2)         | n.a.    |
| LDH                                                                                                                                                    | Normal               | 7 (46.7)  | 71.4   | 13.2                                       | 57.1 (20.5; 93.8)       | 0.191   |
|                                                                                                                                                        | Elevated             | 8 (53.3)  | 87.5   | 4.1                                        | 12.5 (0.0;35.4)         |         |
| Visceral involvement of metastasis                                                                                                                     | Soft tissue/lung     | 7 (46.7)  | 71.4   | 13.2                                       | 57.1 (20.5;93.8)        | 0.088   |
|                                                                                                                                                        | Other                | 8 (53.3)  | 87.5   | 4.1                                        | 12.5 (0;35.4)           |         |
| Relative lymphocyte counts (RLC)                                                                                                                       | <10.5%               | 1 (6.7)   | 100    | 3.0                                        | 0.0                     | 0.079   |
|                                                                                                                                                        | ≥10.5%               | 14 (93.3) | 78.6   | 7.6                                        | 35.7 (10.6;60.8)        |         |
| Absolute eosinophil counts (AEC)                                                                                                                       | <50 counts/μL        | 3 (20.0)  | 100    | 2.5                                        | 0.0                     | 0.009   |
|                                                                                                                                                        | ≥50 counts/μL        | 12 (80.0) | 75.0   | 8.3                                        | 41.7 (13.8;69.6)        |         |
| Absolute monocyte counts (AMC)                                                                                                                         | <650 counts/μL       | 11 (73.3) | 72.7   | 8.3                                        | 45.5 (16.1;74.9)        | 0.185   |
|                                                                                                                                                        | ≥650 counts/ μL      | 4 (26.7)  | 100    | 6.2                                        | 0.0                     |         |
| Lin <sup>-</sup> CD14 <sup>+</sup> HLA-DR <sup>-/low</sup> MDSCs                                                                                       | <5.1%                | 3 (21.4)  | 66.7   | 30.0                                       | 66.7 (13.4;100)         | 0.049   |
|                                                                                                                                                        | ≥5.1%                | 4 (28.6)  | 50.0   | 9.9                                        | 50.0 (1.0; 99.0)        |         |
|                                                                                                                                                        | ≥9.5%                | 7 (50.0)  | 100    | 3.3                                        | 14.3 (0.0;40.2)         |         |
| CD4 <sup>+</sup> CD25 <sup>+</sup> FoxP3 <sup>+</sup> Tregs                                                                                            | <1.5%                | 0 (0)     | 0.0    | n.a.                                       | n.a.                    | n.a.    |
|                                                                                                                                                        | ≥1.5%                | 11 (100)  | 81.1   | 6.2                                        | 27.3 (1.0; 53.6)        |         |
| Combination model considering the following favorable baseline factors: normal LDH, RLC ≥10.5%, AEC ≥50 counts/μL and AMC <650 counts/μL. <sup>#</sup> | 4 favorable factors  | 5 (33.3)  | 60.0   | 30.0                                       | 80.0 (44.9; 100)        | 0.035   |
|                                                                                                                                                        | <4 favorable factors | 10 (66.7) | 90.0   | 4.1                                        | 10.0 (0; 28.6)          |         |

LDH: lactate dehydrogenase; MDSCs: myeloid-derived suppressor cells; OS: overall survival; Tregs: regulatory T cells; n.a.: not applicable; # Martens *et al.* Clin Cancer Res (2016), 22, 2908-18.

**Supplementary Table 3: Associations between early changes in immune cells and outcome**

| Factor                                                           | Categories | N (%)     | % dead | Overall survival according to Kaplan-Meier |                         |         |
|------------------------------------------------------------------|------------|-----------|--------|--------------------------------------------|-------------------------|---------|
|                                                                  |            |           |        | Median Survival (months)                   | 1-year OS rate (95% CI) | p-value |
| Absolute lymphocyte counts                                       | Increase   | 13 (86.7) | 76.9   | 7.7                                        | 38.5 (12.0; 64.9)       | 0.152   |
|                                                                  | Decrease   | 2 (13.3)  | 100    | 1.2                                        | 0.0                     |         |
| Relative lymphocyte counts                                       | Increase   | 12 (80.0) | 75.0   | 8.3                                        | 41.7 (13.8; 69.5)       | 0.048   |
|                                                                  | Decrease   | 3 (20.0)  | 100    | 3.3                                        | 0.0                     |         |
| Absolute eosinophil counts                                       | Increase   | 15 (100)  | 80     | 7.6                                        | 33.3 (9.5; 57.2)        | n.a.    |
|                                                                  | Decrease   | 0 (0.0)   | n.a.   | n.a.                                       | n.a.                    |         |
| Absolute monocyte counts                                         | Increase   | 5 (33.3)  | 100    | 6.2                                        | 20.0 (0.0; 55.1)        | 0.321   |
|                                                                  | Decrease   | 10 (66.7) | 70.0   | 8.3                                        | 40.0 (9.6; 70.4)        |         |
| Lin <sup>-</sup> CD14 <sup>+</sup> HLA-DR <sup>-/low</sup> MDSCs | Increase   | 3 (37.5)  | 100    | 7.6                                        | 33.3 (0.0; 86.7)        | 0.977   |
|                                                                  | Decrease   | 5 (62.5)  | 80     | 6.2                                        | 40.0 (0.0; 82.9)        |         |
| CD4 <sup>+</sup> CD25 <sup>+</sup> FoxP3 <sup>+</sup> Tregs      | Increase   | 7 (100)   | 85.7   | 6.2                                        | 28.6 (0.0; 62.0)        | n.a.    |
|                                                                  | Decrease   | 0 (0.0)   | n.a.   | n.a.                                       | n.a.                    |         |

MDSCs: myeloid-derived suppressor cells; Tregs: regulatory T cells; n.a.: not applicable

**Supplementary Table 4: Associations between late changes in immune cells and outcome**

| Factor                                                           | Categories | N (%)    | % dead | Overall survival according to Kaplan-Meier |                         |         |
|------------------------------------------------------------------|------------|----------|--------|--------------------------------------------|-------------------------|---------|
|                                                                  |            |          |        | Median Survival (months)                   | 1-year OS rate (95% CI) | p-value |
| Absolute lymphocyte counts                                       | Increase   | 5 (50.0) | 60.0   | 30.0                                       | 80.0 (44.9; 100)        | 0.105   |
|                                                                  | Decrease   | 5 (50.0) | 80.0   | 6.2                                        | 20.0 (0.0; 55.1)        |         |
| Relative lymphocyte counts                                       | Increase   | 4 (40.0) | 50.0   | 13.2                                       | 75.0 (32.6; 100)        | 0.196   |
|                                                                  | Decrease   | 6 (60.0) | 83.3   | 6.2                                        | 33.3 (0.0; 71.1)        |         |
| Absolute eosinophil counts                                       | Increase   | 7 (70.0) | 71.4   | 13.2                                       | 57.1 (20.5; 93.8)       | 0.378   |
|                                                                  | Decrease   | 3 (30.0) | 66.7   | 4.1                                        | 33.3 (0.0; 86.6)        |         |
| Absolute monocyte counts                                         | Increase   | 6 (60.0) | 66.7   | 9.9                                        | 50.0 (10.0; 90.0)       | 0.961   |
|                                                                  | Decrease   | 4 (40.0) | 75.0   | 8.3                                        | 50.0 (1.0; 99.0)        |         |
| Lin <sup>-</sup> CD14 <sup>+</sup> HLA-DR <sup>-/low</sup> MDSCs | Increase   | 3 (60.0) | 100    | n.a.                                       | 33.3 (0.0; 86.7)        | 0.063   |
|                                                                  | Decrease   | 2 (40.0) | 0      | n.a.                                       | n.a.                    |         |
| CD4 <sup>+</sup> CD25 <sup>+</sup> FoxP3 <sup>+</sup> Tregs      | Increase   | 1 (100)  | 100    | 4.1                                        | n.a.                    | n.a.    |
|                                                                  | Decrease   | 0 (0.0)  | n.a.   | n.a.                                       | n.a.                    |         |

MDSCs: myeloid-derived suppressor cells; Tregs: regulatory T cells; n.a.: not applicable

# Supplementary Figure 1: Gating strategy for flow cytometric data

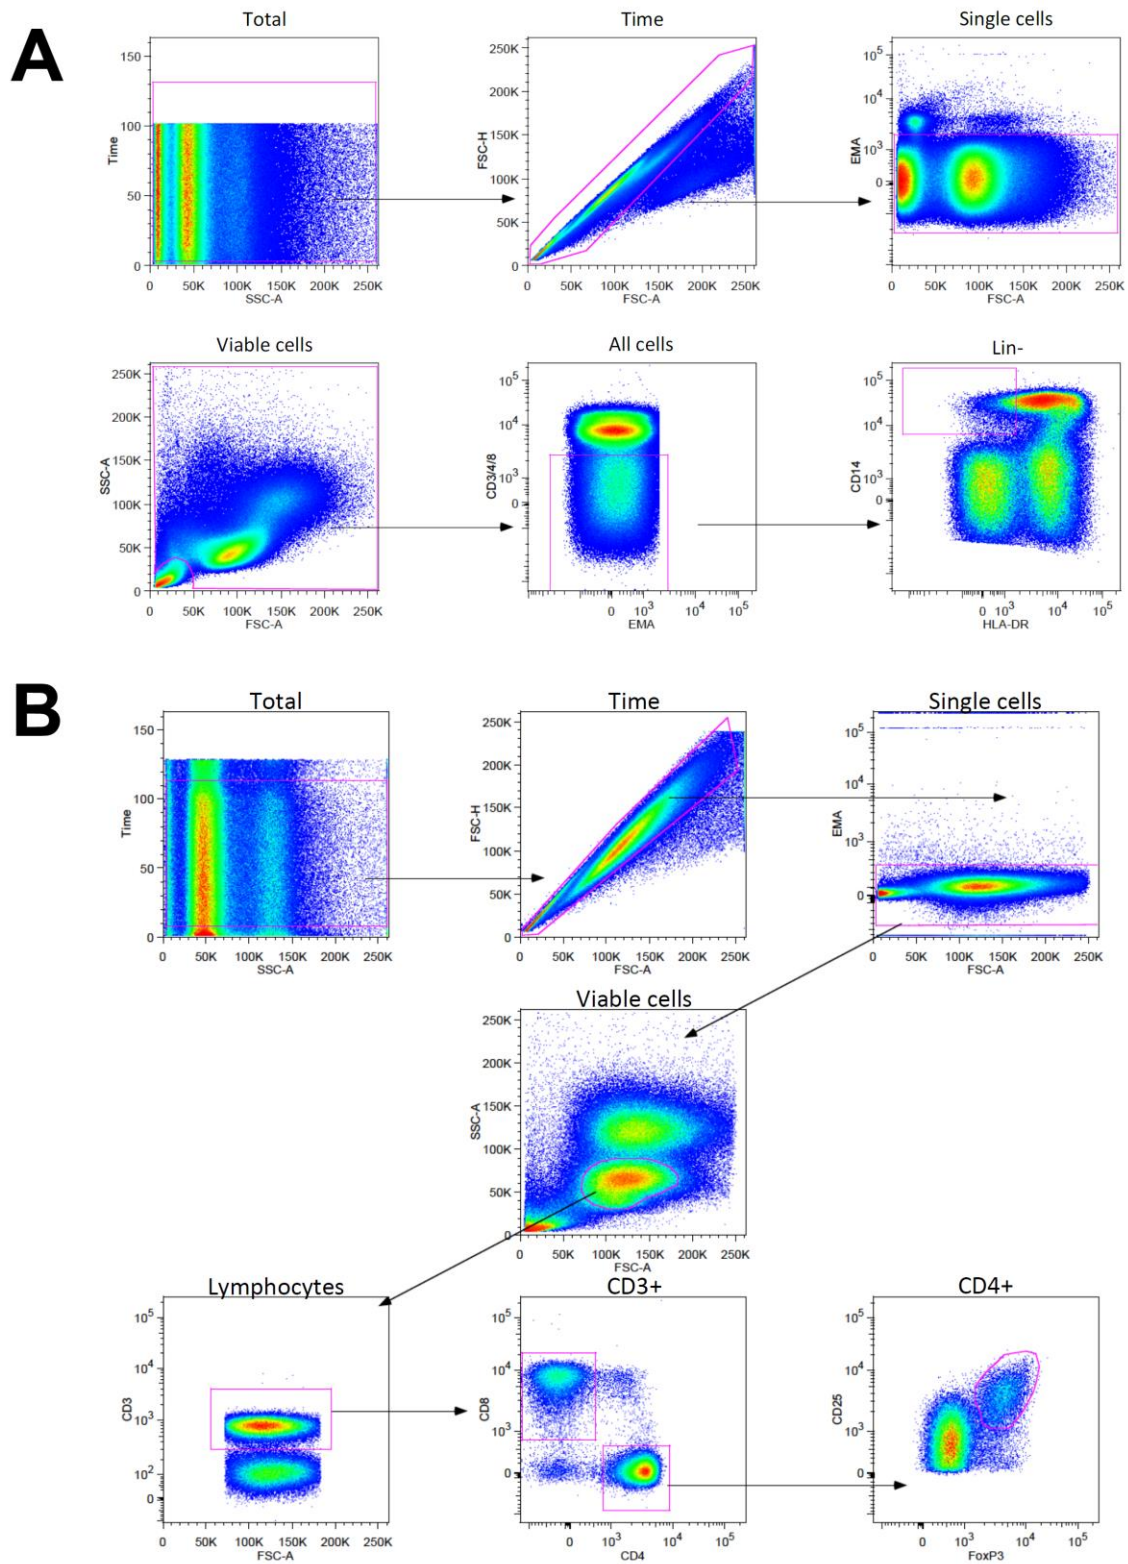

**Supplementary Figure 1: Gating strategy for flow cytometric data.** Progressive gating strategies were used to identify previously-described populations of Lin<sup>-</sup> CD14<sup>+</sup>HLA-DR<sup>-/low</sup> MDSCs (A) and CD4<sup>+</sup>CD25<sup>+</sup>FoxP3<sup>+</sup> Tregs (B). For both populations Time vs. SSC-A was used to select total cells, followed by FSC-H and FSC-A for single cells. Viable cells were defined as EMA<sup>-</sup>. For MDSC identification, lineage (CD3/4/8)-negative cells within total cells were selected and further subdivided into the CD14<sup>+</sup> and HLA-DR<sup>-/low</sup> populations (A). For Tregs, the lymphocyte population was used and CD3<sup>+</sup> cells selected. Among cells expressing CD4<sup>+</sup>, Tregs were defined as CD25<sup>+</sup>FoxP3<sup>+</sup> (B).
